# Supplementary material for: Distribution Characteristics and Risk Assessment of 57 Pesticides in Farmland Soil and the Surrounding Water
Source: MDPI journal article supplement (doi:10.3390/toxics12010085), 2024-01-18
Supplement: s1 [file s1]

# **Supplementary Materials: Distribution Characteristics and Risk Assessment of 57 Pesticides in Farmland Soil and the Surrounding Water**

Weiqing Wang, Donghong Wang, Quanzhen Liu, Lihua Lin, Yongchang Xie, Chuan Du

Table S1 Details of sampling sites

| Site | Position                        | Longitude E (°) | Latitude N (°) | Type of samples   | Sampling period                                      |
|------|---------------------------------|-----------------|----------------|-------------------|------------------------------------------------------|
| D1   | Xingkai Lake Farm drainage      | 132.875291      | 45.357833      | Surface water     | Sowing period, vegetative period and maturity period |
| D2   | Xingkai Lake Farm main drainage | 132.807865      | 45.288962      | Surface water     | Sowing period, vegetative period and maturity period |
| D3   | Changlinzi drainage             | 132.307402      | 45.348883      | Surface water     | Sowing period, vegetative period and maturity period |
| D4   | Chengzi river drainage          | 132.403317      | 45.454829      | Surface water     | Sowing period, vegetative period and maturity period |
| L1   | Da Xingkai Lake                 | 132.627942      | 45.298944      | Surface water     | Vegetative period and maturity period                |
| L2   | Da Xingkai Lake                 | 132.188575      | 45.330419      | Surface water     | Vegetative period and maturity period                |
| L3   | Xiao Xingkai Lake               | 132.775032      | 45.263043      | Surface water     | Vegetative period and maturity period                |
| L4   | Xiao Xingkai Lake               | 132.581255      | 45.314456      | Surface water     | Vegetative period and maturity period                |
| S1   | Chengzihe Farm                  | 132.291722      | 45.436892      | Soybean base soil | Vegetative period                                    |
| S2   | Baiyuwan Farm                   | 132.209365      | 45.413395      | Soybean base soil | Maturity period                                      |
| S3   | Chengzihe Farm                  | 132.363748      | 45.445875      | Soybean base soil | Maturity period                                      |
| S4   | Xingkai Lake Farm               | 132.907559      | 45.328652      | Soybean base soil | Maturity period                                      |
| C1   | Baiyuwan Farm                   | 132.207321      | 45.334397      | Corn base soil    | Vegetative period                                    |
| C2   | Baiyuwan Farm                   | 132.215229      | 45.419064      | Corn base soil    | Maturity period                                      |
| C3   | Xingkai Lake Farm               | 132.931234      | 45.312317      | Corn base soil    | Maturity period                                      |
| P1   | Xingkai Lake Farm paddy field   | 132.87876       | 45.366899      | Surface water     | Vegetative period                                    |
| P2   | Xingkai Lake Farm paddy field   | 132.807147      | 45.288541      | Surface water     | Sowing period and vegetative period                  |
| P3   | Changlinzi Farm paddy field     | 132.284454      | 45.348337      | Surface water     | Sowing period and vegetative period                  |
| P4   | Chengzihe Farm paddy field      | 132.403182      | 45.454134      | Surface water     | Sowing period and vegetative period                  |
| P1   | Xingkai Lake Farm paddy field   | 132.87876       | 45.366899      | Paddy base soil   | Vegetative period                                    |
| P2   | Xingkai Lake Farm paddy field   | 132.807147      | 45.288541      | Paddy base soil   | Vegetative period                                    |
| P3   | Changlinzi Farm paddy field     | 132.284454      | 45.348337      | Paddy base soil   | Vegetative period                                    |
| P4   | Chengzihe Farm paddy field      | 132.403182      | 45.454134      | Paddy base soil   | Vegetative period                                    |
| P5   | Baiyuwan Farm paddy field       | 132.201172      | 45.365331      | Paddy base soil   | Maturity period                                      |
| P6   | Xingkai Lake Farm paddy field   | 132.799877      | 45.282703      | Paddy base soil   | Maturity period                                      |
| P7   | Xingkai Lake Farm paddy field   | 132.841185      | 45.277148      | Paddy base soil   | Maturity period                                      |

Table S2 Details, quantitative and qualitative ion (m/z), retention time, regression curve parameter, mean recoveries, the limit of detection (LOD), the limit of quantitation (LOQ) and supply company of 57 pesticides and three degradation products

| Name                  | CAS         | LOD<br>(ng·L <sup>-1</sup> ) | LOQ<br>(ng·L <sup>-1</sup> ) | Quantitative<br>ion (m/z) | Qualitative<br>ion1 (m/z) | Qualitative<br>ion2 (m/z) | Retention<br>time<br>(min) | Linear term | Constant term | R <sup>2</sup> | Mean<br>recovery in<br>water (%) | Mean<br>recovery<br>in soil (%) | Supply<br>company |
|-----------------------|-------------|------------------------------|------------------------------|---------------------------|---------------------------|---------------------------|----------------------------|-------------|---------------|----------------|----------------------------------|---------------------------------|-------------------|
| Acetochlor            | 34256-82-1  | 0.001                        | 0.0025                       | 146                       | 162                       | 132                       | 15.301                     | 3.108E+01   | 3.670E+02     | 0.9983         | 100.00                           | 102.35                          | Accustandard      |
| Alachlor              | 15972-60-8  | 0.005                        | 0.01                         | 160                       | 188                       | 237                       | 17.378                     | 4.166E+01   | 1.157E+02     | 0.9998         | 97.82                            | 83.92                           | Accustandard      |
| Ametryn               | 834-12-8    | 0.0025                       | 0.01                         | 212                       | 227                       | 170                       | 17.839                     | 4.773E+01   | 1.988E+02     | 0.9996         | 96.49                            | 89.04                           | Accustandard      |
| Anvil                 | 79983-71-4  | 0.005                        | 0.025                        | 214                       | 83                        | 216                       | 20.406                     | 3.553E+01   | 3.315E+02     | 0.9998         | 101.70                           | 93.01                           | Anpel             |
| Atrazine              | 1912-24-9   | 0.001                        | 0.0025                       | 200                       | 215                       | 202                       | 13.372                     | 5.339E+01   | 5.376E+02     | 0.999          | 98.80                            | 109.32                          | Accustandard      |
| Atrazine-desisopropyl | 1007-28-9   | 0.005                        | 0.025                        | 158                       | 173                       | 145                       | 11.686                     | 1.892E+01   | 6.537E+01     | 0.9996         | 81.70                            | 86.87                           | Accustandard      |
| Baycarb               | 3766-81-2   | 0.0025                       | 0.01                         | 121                       | 122                       | 150                       | 9.291                      | 9.908E+01   | 1.691E+02     | 0.9996         | 91.76                            | 93.70                           | Accustandard      |
| Bentazon methyl       | 61592-45-8  | 0.0025                       | 0.01                         | 212                       | 105                       | 104                       | 15.986                     | 6.550E+01   | 5.464E+02     | 0.9992         | 99.62                            | 95.31                           | Anpel             |
| Bolstar               | 35400-43-2  | 0.01                         | 0.025                        | 322                       | 156                       | 140                       | 25.485                     | 4.940E+01   | -2.424E+02    | 0.9993         | 80.64                            | 69.69                           | Accustandard      |
| Buprofezin            | 69327-76-0  | 0.01                         | 0.025                        | 172                       | 175                       | 305                       | 25.861                     | 2.221E+01   | -3.623E+00    | 0.9998         | 97.07                            | 92.55                           | Accustandard      |
| Butachlor             | 23184-66-9  | 0.001                        | 0.0025                       | 176                       | 160                       | 188                       | 19.213                     | 5.474E+01   | 5.706E+02     | 0.999          | 102.90                           | 88.23                           | Accustandard      |
| Chlorpyrifos          | 2921-88-2   | 0.001                        | 0.0025                       | 314                       | 316                       | 197                       | 16.902                     | 3.697E+01   | 4.335E+02     | 0.9985         | 104.30                           | 96.46                           | Accustandard      |
| Cycluron              | 8015-55-2   | 0.005                        | 0.01                         | 72                        | 89                        | 127                       | 13.631                     | 2.907E+01   | 3.787E+02     | 0.9992         | 101.10                           | 88.88                           | Accustandard      |
| Demeton               | 8065-48-3   | 0.01                         | 0.025                        | 88                        | 89                        | 171                       | 12.635                     | 5.419E+00   | 2.823E+01     | 0.9993         | 74.81                            | 88.27                           | Accustandard      |
| Desethylatrazine      | 6190-65-4   | 0.0025                       | 0.005                        | 172                       | 187                       | 145                       | 11.869                     | 6.458E+01   | 4.657E+02     | 0.999          | 96.00                            | 86.35                           | Accustandard      |
| Diazinon              | 333-41-5    | 0.005                        | 0.01                         | 304                       | 137                       | 179                       | 15.823                     | 6.963E+00   | -2.740E+01    | 0.9993         | 94.45                            | 100.51                          | Accustandard      |
| Dichlorvos            | 62-73-7     | 0.0025                       | 0.005                        | 185                       | 187                       | 220                       | 8.066                      | 2.618E+01   | 1.413E+02     | 0.9993         | 97.78                            | 96.80                           | Accustandard      |
| Dimethachlor          | 50563-36-5  | 0.0025                       | 0.01                         | 134                       | 197                       | 132                       | 16.933                     | 1.176E+02   | 5.161E+02     | 0.9997         | 97.95                            | 74.10                           | Accustandard      |
| Dimethazone           | 81777-89-1  | 0.001                        | 0.0025                       | 204                       | 125                       | 127                       | 13.302                     | 6.580E+01   | 4.657E+02     | 0.999          | 97.50                            | 98.36                           | Accustandard      |
| Epoxiconazole         | 133855-98-8 | 0.005                        | 0.01                         | 111                       | 138                       | 165                       | 23.477                     | 1.553E+01   | 4.015E+02     | 0.9989         | 87.70                            | 85.04                           | TMRM              |
| Ethoprop              | 13194-48-4  | 0.01                         | 0.025                        | 158                       | 200                       | 242                       | 13.043                     | 4.476E+00   | 2.075E+01     | 0.9994         | 91.00                            | 65.06                           | Accustandard      |
| Fenoxanil             | 115852-48-7 | 0.0025                       | 0.01                         | 189                       | 191                       | 293                       | 21.396                     | 1.373E+02   | 1.245E+03     | 0.9992         | 95.59                            | 96.10                           | Anpel             |
| Fenson                | 80-38-6     | 0.0025                       | 0.01                         | 141                       | 77                        | 268                       | 18.024                     | 6.831E+01   | 4.232E+02     | 0.9992         | 102.04                           | 96.65                           | Anpel             |
| Fenthion              | 55-38-9     | 0.005                        | 0.01                         | 278                       | 153                       | 169                       | 19.728                     | 4.581E+01   | -3.023E+02    | 0.999          | 77.72                            | 80.77                           | Accustandard      |
| Fludioxonil           | 131341-86-1 | 0.005                        | 0.025                        | 248                       | 154                       | 127                       | 25.934                     | 5.213E+01   | -2.730E+01    | 0.9999         | 91.92                            | 98.80                           | Accustandard      |
| Gesatamine            | 1610-17-9   | 0.0025                       | 0.01                         | 196                       | 211                       | 169                       | 13.477                     | 8.073E+01   | 7.340E+02     | 0.9993         | 100.43                           | 94.26                           | Accustandard      |
| Isoprocarb            | 2631-40-5   | 0.0025                       | 0.01                         | 121                       | 136                       | 103                       | 8.057                      | 7.437E+01   | -1.988E+02    | 0.9999         | 90.09                            | 89.34                           | Accustandard      |
| Isoprothiolane        | 50512-35-1  | 0.001                        | 0.0025                       | 118                       | 162                       | 189                       | 19.896                     | 4.386E+01   | 4.028E+02     | 0.9992         | 101.40                           | 103.35                          | Accustandard      |
| Malathion             | 121-75-5    | 0.025                        | 0.05                         | 173                       | 158                       | 143                       | 19.035                     | 7.825E+00   | -2.398E+01    | 0.9998         | 100.68                           | 65.07                           | Accustandard      |
| Mefenacet             | 73250-68-7  | 0.0025                       | 0.005                        | 192                       | 136                       | 120                       | 25.562                     | 1.117E+02   | 2.350E+03     | 0.9986         | 86.10                            | 97.88                           | Accustandard      |
| Metalaxyl             | 57837-19-1  | 0.0025                       | 0.01                         | 206                       | 132                       | 160                       | 16.179                     | 3.410E+01   | 2.946E+02     | 0.9991         | 100.83                           | 92.90                           | Rhawn             |
| Metazachlor           | 67129-08-2  | 0.01                         | 0.05                         | 132                       | 133                       | 209                       | 20.071                     | 2.717E+01   | 7.089E+01     | 0.9997         | 100.01                           | 91.42                           | Accustandard      |

|               |             |        |        |     |     |     |        |           |            |        |        |       |              |
|---------------|-------------|--------|--------|-----|-----|-----|--------|-----------|------------|--------|--------|-------|--------------|
| Metolachlor   | 51218-45-2  | 0.0025 | 0.01   | 238 | 162 | 240 | 17.194 | 5.142E+01 | 1.886E+02  | 0.9997 | 100.15 | 95.06 | Accustandard |
| Metribuzin    | 21087-64-9  | 0.0025 | 0.01   | 198 | 199 | 103 | 15.826 | 1.535E+01 | 2.296E+02  | 0.9992 | 99.36  | 99.00 | Anpel        |
| Mevinphos     | 7786-34-7   | 0.01   | 0.025  | 127 | 192 | 164 | 9.643  | 5.749E+00 | -1.658E+01 | 0.9993 | 98.14  | 73.00 | Accustandard |
| Oxadiazon     | 19666-30-9  | 0.001  | 0.0025 | 175 | 258 | 177 | 20.624 | 4.825E+02 | 2.663E+03  | 0.9993 | 101.77 | 99.35 | Anpel        |
| Paclobutrazol | 76738-62-0  | 0.0025 | 0.005  | 236 | 125 | 167 | 19.278 | 7.063E+01 | 4.318E+02  | 0.9994 | 98.30  | 84.88 | Accustandard |
| Phorate       | 298-02-2    | 0.01   | 0.025  | 260 | 121 | 231 | 14.205 | 6.963E+00 | -2.740E+01 | 0.9993 | 90.24  | 69.31 | Accustandard |
| Picoxystrobin | 117428-22-5 | 0.005  | 0.025  | 335 | 146 | 145 | 24.446 | 4.542E+01 | -1.255E+02 | 0.9999 | 93.46  | 88.60 | Accustandard |
| Pirimicarb    | 23103-98-2  | 0.0025 | 0.01   | 166 | 72  | 238 | 17.981 | 1.032E+02 | 1.076E+02  | 0.9999 | 90.75  | 64.30 | Accustandard |
| Prebane       | 886-50-0    | 0.005  | 0.01   | 226 | 185 | 241 | 20.575 | 7.662E+01 | -7.838E+01 | 0.9999 | 98.04  | 85.91 | Accustandard |
| Pretilachlor  | 51218-49-6  | 0.005  | 0.01   | 202 | 238 | 262 | 20.297 | 1.157E+01 | -3.329E+01 | 0.9998 | 100.31 | 97.56 | Rhawn        |
| Procymidone   | 32809-16-8  | 0.005  | 0.025  | 283 | 285 | 284 | 23.631 | 4.732E+01 | -2.318E+02 | 0.9997 | 93.90  | 68.70 | Accustandard |
| Prometon      | 1610-18-0   | 0.005  | 0.01   | 210 | 225 | 168 | 14.979 | 3.257E+01 | 1.997E+02  | 0.9996 | 98.39  | 94.47 | Accustandard |
| Prometryn     | 7287-19-6   | 0.001  | 0.0025 | 241 | 226 | 184 | 16.102 | 6.275E+01 | 6.769E+02  | 0.9984 | 100.20 | 93.65 | Accustandard |
| Propazine     | 139-40-2    | 0.005  | 0.01   | 214 | 216 | 229 | 15.188 | 5.569E+01 | 2.581E+02  | 0.9991 | 97.70  | 91.29 | Accustandard |
| Propiconazole | 60207-90-1  | 0.005  | 0.01   | 259 | 261 | 173 | 22.391 | 3.046E+01 | 6.310E+01  | 0.9993 | 95.60  | 81.83 | Accustandard |
| Propoxur      | 114-26-1    | 0.005  | 0.01   | 110 | 152 | 111 | 7.488  | 1.100E+02 | -1.545E+02 | 0.9999 | 92.99  | 60.88 | Accustandard |
| Ronnel        | 299-84-3    | 0.005  | 0.01   | 285 | 287 | 125 | 18.448 | 3.344E+01 | -1.984E+02 | 0.9991 | 97.59  | 90.04 | Accustandard |
| Sebuthylazin  | 7286-69-3   | 0.0025 | 0.01   | 200 | 229 | 202 | 16.556 | 1.365E+02 | 4.231E+00  | 0.9999 | 97.92  | 88.47 | Accustandard |
| Simazine      | 122-34-9    | 0.01   | 0.025  | 201 | 202 | 186 | 14.954 | 1.047E+01 | 1.203E+02  | 0.9993 | 98.06  | 91.70 | Accustandard |
| Simetryn      | 1014-70-6   | 0.001  | 0.0025 | 170 | 198 | 213 | 15.875 | 8.247E+01 | 7.90E+02   | 0.9989 | 100.70 | 94.92 | Accustandard |
| s-Metolachlor | 87392-12-9  | 0.0025 | 0.01   | 162 | 238 | 240 | 18.695 | 1.235E+02 | 6.034E+02  | 0.9995 | 98.30  | 95.79 | Accustandard |
| Sulfotep      | 3689-24-5   | 0.001  | 0.0025 | 322 | 202 | 238 | 13.608 | 7.840E+01 | -2.197E+02 | 0.9998 | 91.84  | 60.98 | Accustandard |
| Tebuconazole  | 107534-96-3 | 0.005  | 0.01   | 250 | 252 | 125 | 23.133 | 4.842E+01 | 6.773E+01  | 0.9997 | 93.00  | 87.18 | Accustandard |
| Tebuthiuron   | 34014-18-1  | 0.01   | 0.025  | 156 | 171 | 74  | 12.625 | 5.749E+01 | -6.519E+02 | 0.9996 | 97.90  | 85.40 | Accustandard |
| Tokuthion     | 34643-46-4  | 0.01   | 0.025  | 309 | 267 | 162 | 23.088 | 2.189E+01 | -1.839E+02 | 0.9992 | 98.08  | 75.56 | Accustandard |
| Trichloronate | 327-98-0    | 0.005  | 0.01   | 297 | 269 | 109 | 20.229 | 4.123E+01 | 5.290E+01  | 0.9996 | 100.69 | 67.97 | Accustandard |
| Tricyclazole  | 41814-78-2  | 0.0025 | 0.005  | 162 | 189 | 161 | 20.041 | 3.378E+01 | -5.741E+02 | 0.9993 | 89.90  | 89.80 | Accustandard |
| Uniconazole   | 83657-22-1  | 0.005  | 0.025  | 234 | 70  | 236 | 20.843 | 5.144E+01 | 1.682E+02  | 0.9993 | 89.80  | 89.58 | Anpel        |

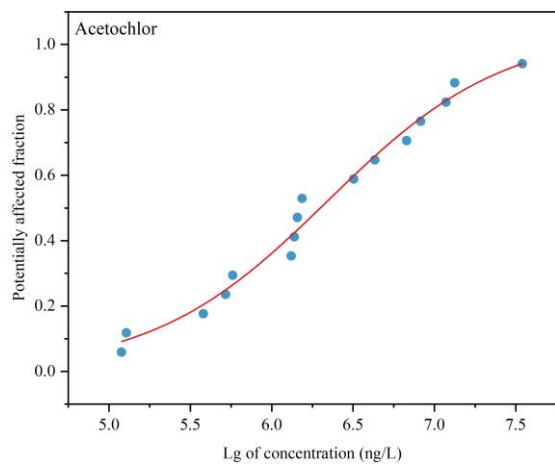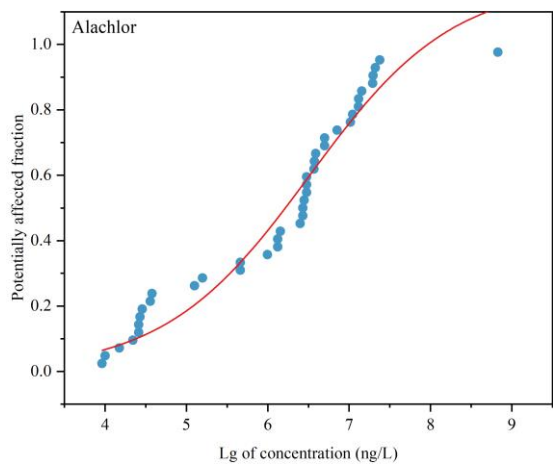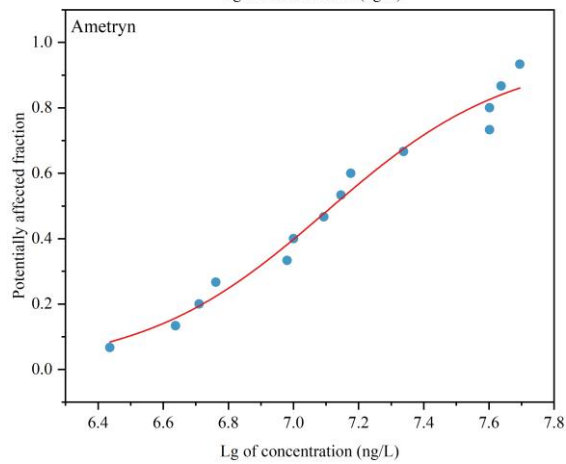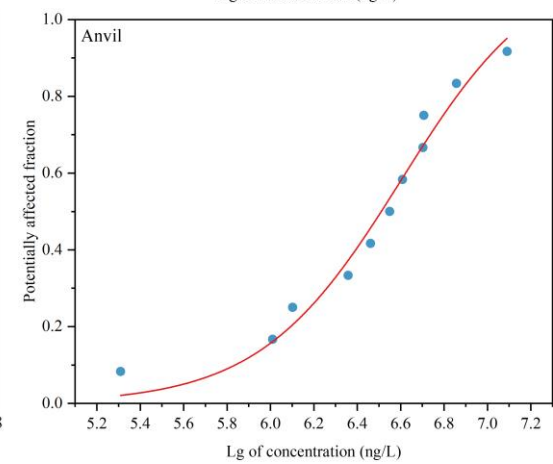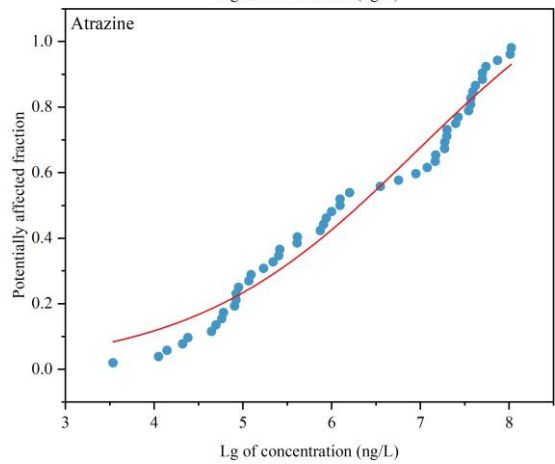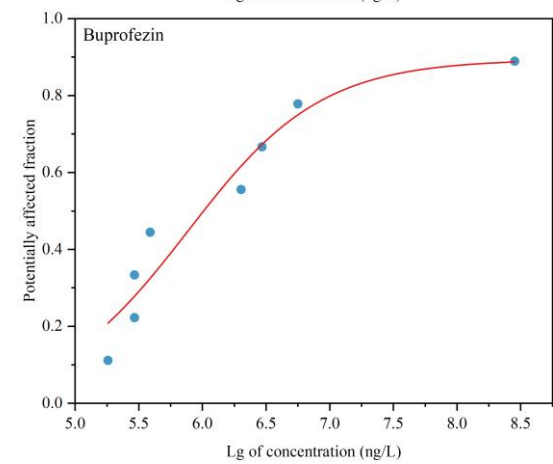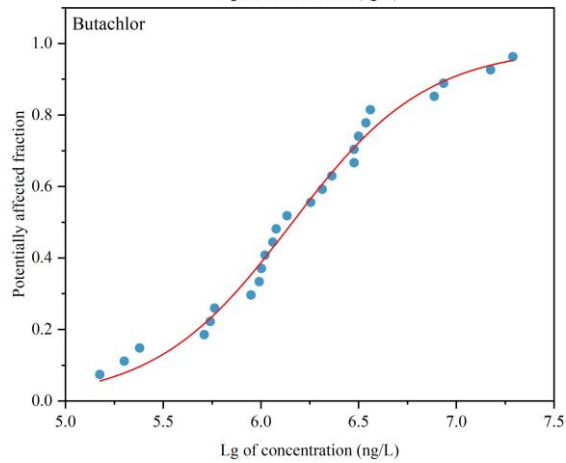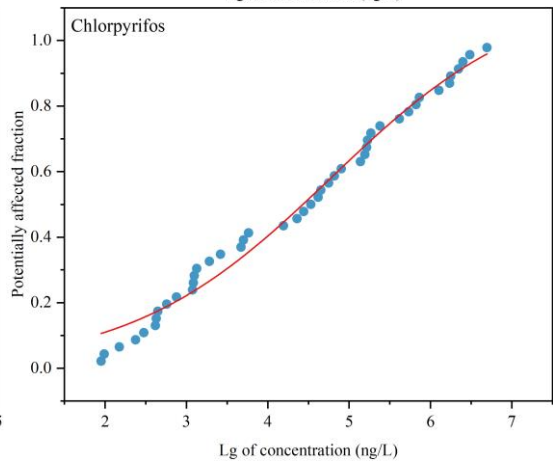

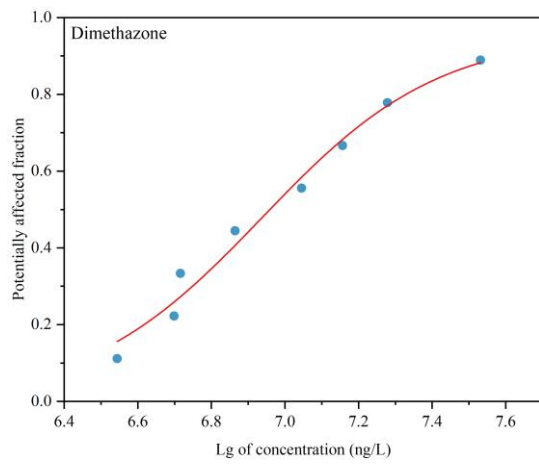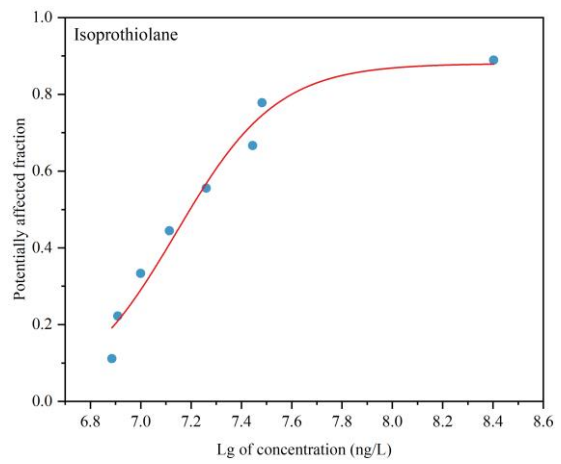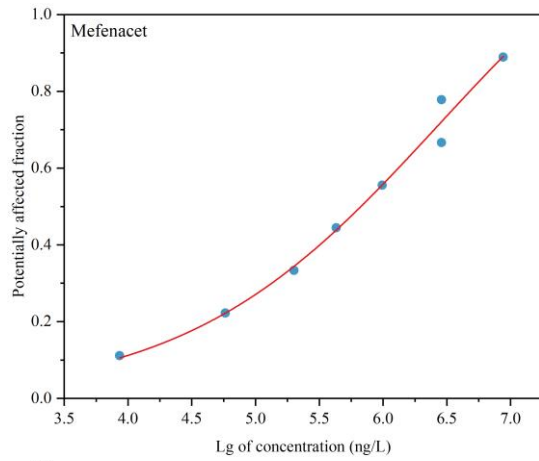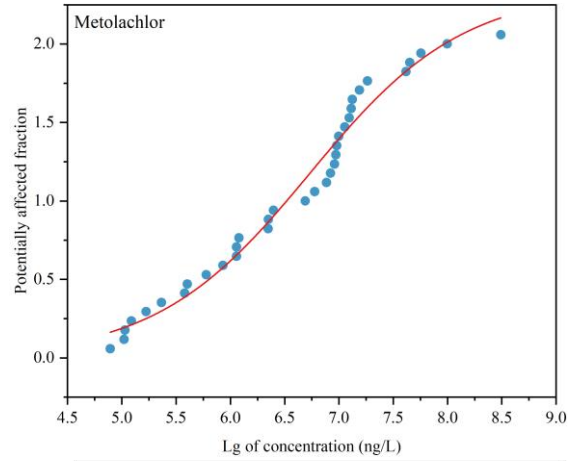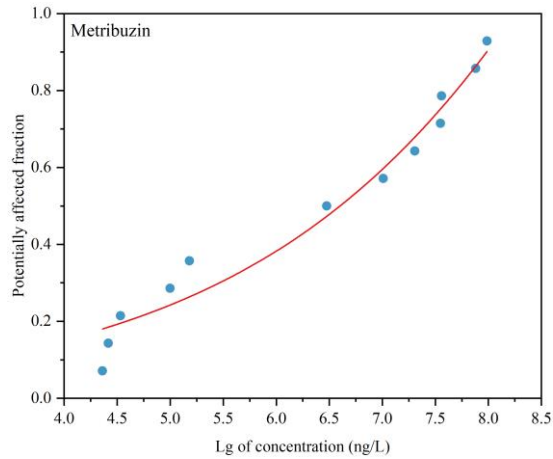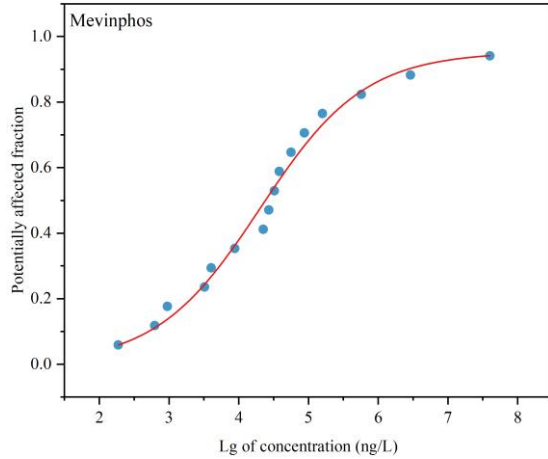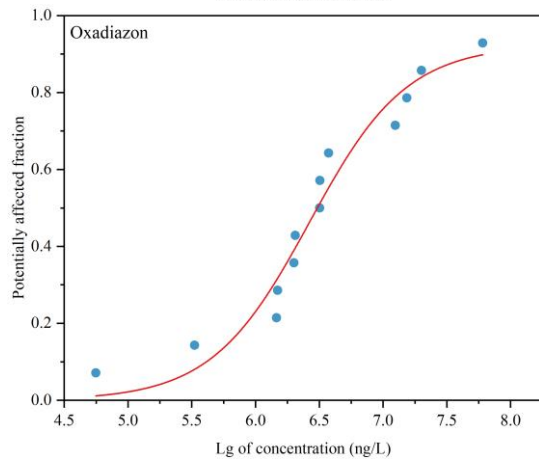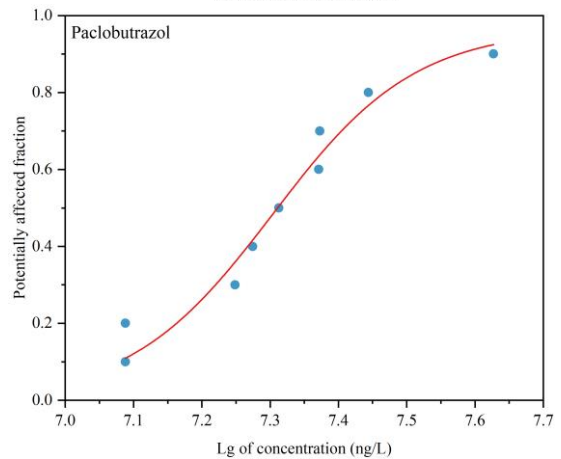

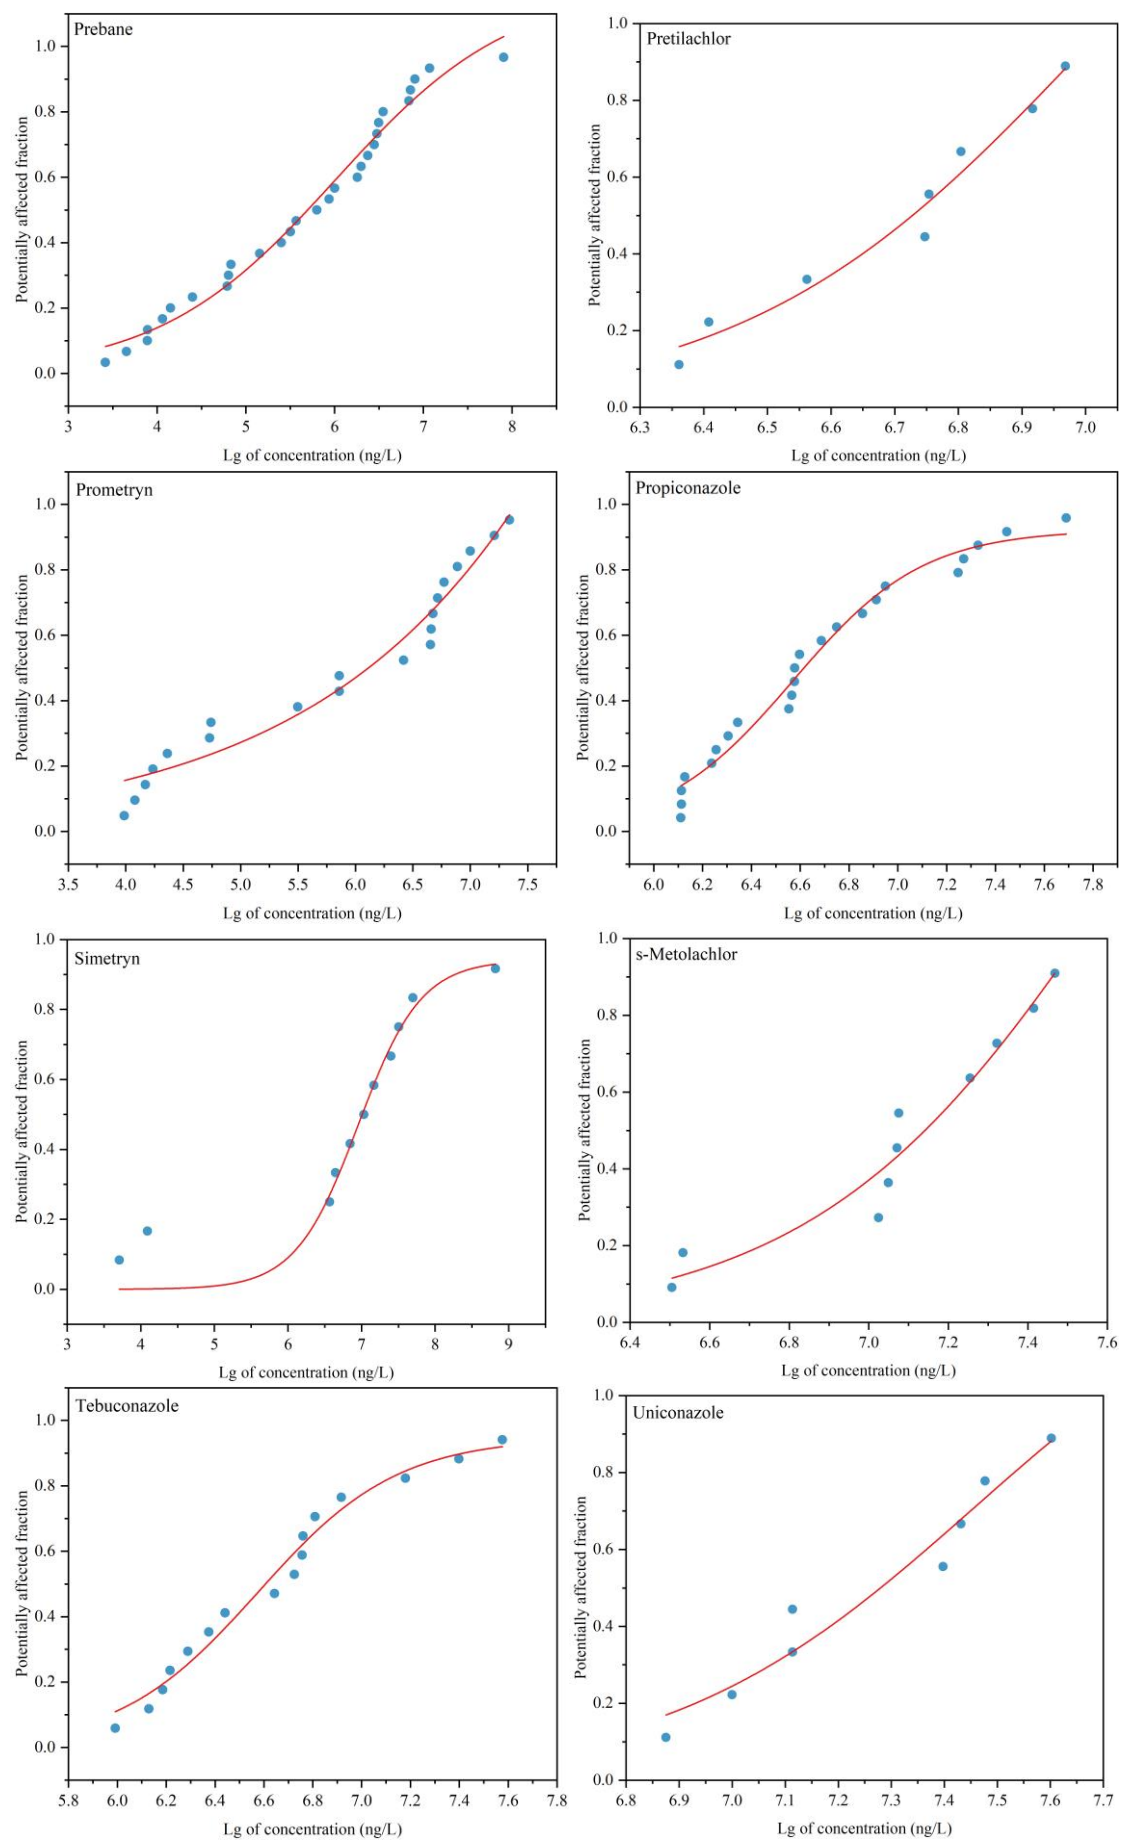

Fig. S1 Species sensitivity distribution (SSD) of 24 pesticides in Xingkai Lake water

Table S3 Summary of regression parameters and regression coefficient of species sensitivity distribution (SSD)

| Name           | $a$      | $x_c$    | $k$     | $r^2$   |
|----------------|----------|----------|---------|---------|
| Acetochlor     | 1.04465  | 6.34559  | 1.84754 | 0.98163 |
| Alachlor       | 1.19355  | 6.50733  | 1.12478 | 0.95374 |
| Ametryn        | 0.96607  | 7.10083  | 3.53568 | 0.97272 |
| Anvil          | 1.15953  | 6.60032  | 3.0931  | 0.97593 |
| Atrazine       | 1.32864  | 6.95324  | 0.79085 | 0.96812 |
| Buprofezin     | 0.89368  | 5.88436  | 1.90421 | 0.93377 |
| Butachlor      | 0.98903  | 6.15377  | 2.87509 | 0.98575 |
| Chlorpyrifos   | 1.15908  | 4.77123  | 0.81431 | 0.98485 |
| Dimethazone    | 0.95704  | 6.9376   | 4.15432 | 0.98138 |
| Isoprothiolane | 0.88012  | 7.14114  | 5.01159 | 0.97295 |
| Mefenacet      | 1.42393  | 6.43445  | 1.01052 | 0.98778 |
| Metolachlor    | 2.34553  | 6.72841  | 1.41239 | 0.97579 |
| Metribuzin     | 5.91165  | 11.55488 | 0.48092 | 0.96708 |
| Mevinphos      | 0.95299  | 4.30979  | 1.33809 | 0.98674 |
| Oxadiazon      | 0.92348  | 6.42096  | 2.6151  | 0.95738 |
| Paclobutrazol  | 0.9661   | 7.30349  | 9.56373 | 0.9685  |
| Prebane        | 1.18501  | 6.01131  | 1.00055 | 0.98309 |
| Pretilachlor   | 1.84605  | 6.9915   | 3.75588 | 0.97128 |
| Prometryn      | 21.71838 | 12.85222 | 0.5661  | 0.9609  |
| Propiconazole  | 0.92278  | 6.57083  | 3.75252 | 0.97709 |
| Simetryn       | 0.94119  | 6.95528  | 2.34654 | 0.95058 |
| s-Metolachlor  | 2.33626  | 7.64072  | 2.60514 | 0.95078 |
| Tebuconazole   | 0.94742  | 6.57456  | 3.49579 | 0.97865 |
| Uniconazole    | 1.41694  | 7.4565   | 3.43266 | 0.95191 |



## Accelerated solvent extraction (ASE) condition optimization

### (1) Optimization of extraction solvent

A total of three groups of experiments with different extraction solvents were set up, and three parallel experiments were set up for each group. The extraction solvents were n-hexane (HEX): acetone (ACE) (1: 1, v/v), HEX: ACE: dichloromethane (DCM) (1: 1: 1, v/v/v), and DCM: ACE (1: 1, v/v). The rest of the soil pretreatment methods were the same, and the specific methods were as follows:

The soil was sieved to a particle size of less than 2 mm after being freeze-dried using Freeze Dry Systems (Freezone 4.5, Labconco, USA). Accelerated solvent extraction (ASE) was carried out with an ASE 350 extractor (Dionex, USA). The extraction program for soil samples was as follows: 5 g of soil was mixed with 2 g of celite in a 34 mL stainless steel vessel, and 150 ng of target compounds was added; heating at 100 °C, 1500 psi for 5 min, static extraction for 5 min, and cycling for two times; and the extraction cell was flushed with 60% of the cell volume of the solvent and purged with nitrogen for 60 s. The extract was dehydrated using anhydrous sodium sulfate and then concentrated to 2 mL using a rotary evaporator (Heidolph, Germany). After the extraction procedures, the extracts were transferred to a Florisil column, which was used to clean up interfering substances. The columns were activated with 10 mL each of HEX and DCM before use. The target components were eluted with 15 mL of HEX. The elute was concentrated to dryness with a gentle nitrogen flow, then the solvent was replaced with HEX, setting the volume to 0.5 mL, and maintained at −20 °C for subsequent instrumental analysis. The result is shown in Fig. S2. The extraction efficiency of the three extraction solvents were not obvious, so we chose HEX: ACE (1: 1, v/v) as the final extraction solvent.

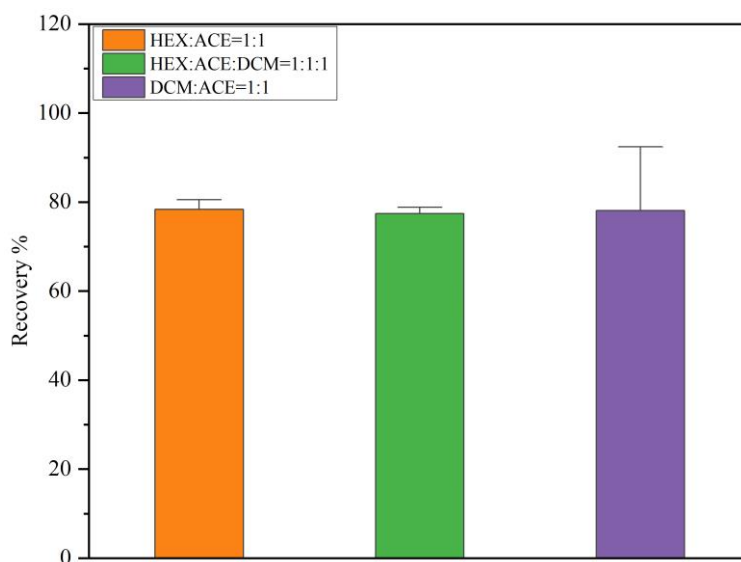

Fig. S2 The results of extraction solvent optimization

### (2) Optimization of elution solvent

A total of two groups of experiments with different elution solvents were set up, and three parallel experiments were set up for each group. The elution solvents were HEX and HEX: DCM (1: 1, v/v). The rest of the soil pretreatment methods were the same, and the specific methods were as follows:

The soil was sieved to a particle size of less than 2 mm after being freeze-dried using Freeze Dry Systems (Freezone 4.5, Labconco, USA). Accelerated solvent extraction (ASE) was carried out with an ASE 350 extractor (Dionex, USA). The extraction program for soil samples was as follows: 5 g of soil was mixed with 2 g of celite in a 34 mL stainless steel vessel, and 150 ng of target compounds was added; then, acetone: HEX (1: 1, v/v) was used as the extraction solvent at 100 °C under a pressure of 1500 psi with 5 min of heating and 5 min of static extraction, which was carried out in two cycles; and the extraction cell was flushed with 60% of the cell volume of the solvent and purged with nitrogen for 60 s. The extract was dehydrated using anhydrous sodium sulfate and then concentrated to 2 mL using a rotary evaporator (Heidolph, Germany). After the extraction procedures, the extracts were transferred to a Florisil column, which was used to clean up interfering substances. The columns were activated with 10 mL each of DCM and HEX before use. The target components were eluted with 15 mL of the elution solvent. The elute was concentrated to dryness with a gentle nitrogen flow, then the solvent was replaced with HEX, setting the volume to 0.5 mL, and maintained at −20 °C for subsequent instrumental analysis. The result is shown in Fig. S3. The recovery of HEX: DCM (1: 1, v/v) was better than that of HEX, so HEX: DCM (1: 1, v/v) was chosen as the elution solvent.

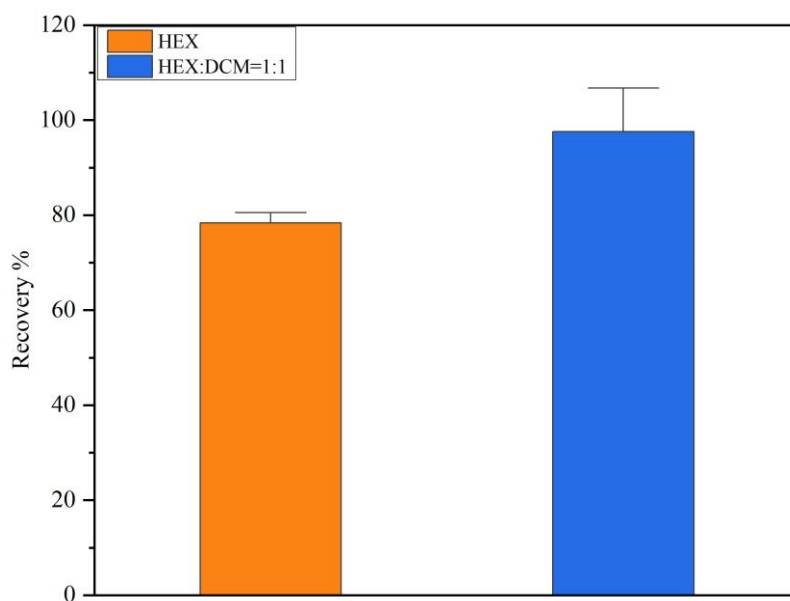

Fig. S3 The results of elution solvent optimization

Table S4 The mean concentrations of the 60 contaminants detected in sowing, vegetative and maturity periods in surrounding water (ng·L<sup>-1</sup>)

| Name                  | Sowing period |          | Vegetative period |          |                 |                   | Maturity period |                 |                   |
|-----------------------|---------------|----------|-------------------|----------|-----------------|-------------------|-----------------|-----------------|-------------------|
|                       | Paddy field   | Drainage | Paddy field       | Drainage | Da Xingkai Lake | Xiao Xingkai Lake | Drainage        | Da Xingkai Lake | Xiao Xingkai Lake |
| Acetochlor            | 22.37         | 185.35   | 33.74             | 135.24   | 163.50          | 52.46             | 25.73           | 34.96           | 32.60             |
| Alachlor              | 9.10          | 3.10     | 18.51             | 1.93     | 9.81            | 1.79              | n.d.            | n.d.            | n.d.              |
| Ametryn               | 1.78          | 2.50     | 13.90             | 9.36     | 1.83            | 3.94              | 0.62            | 4.04            | 1.58              |
| Anvil                 | 22.03         | 6.72     | 10.51             | 30.88    | 106.73          | 1.29              | 13.71           | 7.86            | 8.84              |
| Atrazine              | 9.58          | 45.34    | 87.30             | 431.12   | 426.53          | 114.44            | 123.32          | 153.63          | 194.78            |
| Atrazine-desisopropyl | 0.48          | 0.57     | 1.28              | 24.87    | 19.45           | 6.11              | 2.60            | 10.52           | 8.55              |
| Baycarb               | 3.66          | 2.47     | 6.74              | n.d.     | n.d.            | n.d.              | 4.90            | n.d.            | 7.67              |
| Bentazon methyl       | 10.18         | 3.56     | 126.32            | 32.38    | 12.48           | 1.12              | 2.57            | 1.45            | 1.44              |
| Bolstar               | n.d.          | n.d.     | n.d.              | n.d.     | n.d.            | n.d.              | n.d.            | n.d.            | n.d.              |
| Buprofezin            | n.d.          | n.d.     | 1498.25           | 498.66   | 501.72          | 243.76            | 201.38          | 181.69          | 280.31            |
| Butachlor             | 8.14          | 20.62    | 143.30            | 36.10    | 108.51          | 16.71             | 7.38            | 9.88            | 11.23             |
| Chlorpyrifos          | 0.43          | 1.38     | 47.56             | 14.01    | 14.86           | 0.68              | 0.40            | n.d.            | n.d.              |
| Cycluron              | n.d.          | n.d.     | 9.77              | n.d.     | n.d.            | n.d.              | n.d.            | n.d.            | n.d.              |
| Demeton               | n.d.          | n.d.     | 20.49             | n.d.     | 8.37            | 15.50             | 14.34           | 19.32           | 4.77              |
| Desethylatrazine      | 2.05          | 39.17    | 31.88             | 106.29   | 71.69           | 33.47             | 30.09           | 38.09           | 42.73             |
| Diazinon              | n.d.          | n.d.     | n.d.              | n.d.     | n.d.            | n.d.              | n.d.            | n.d.            | n.d.              |
| Dichlorvos            | 2.05          | n.d.     | n.d.              | n.d.     | n.d.            | n.d.              | n.d.            | n.d.            | n.d.              |
| Dimethachlor          | 2.28          | n.d.     | n.d.              | n.d.     | 0.66            | n.d.              | n.d.            | n.d.            | n.d.              |
| Dimethazone           | 5.27          | 68.53    | 40.56             | 124.43   | 64.08           | 29.46             | 17.05           | 29.06           | 39.29             |
| Epoxiconazole         | 0.50          | n.d.     | n.d.              | 1.59     | n.d.            | n.d.              | 3.64            | n.d.            | n.d.              |
| Ethoprop              | n.d.          | n.d.     | n.d.              | n.d.     | n.d.            | n.d.              | n.d.            | n.d.            | n.d.              |
| Fenoxanil             | 4.45          | 5.56     | 36.41             | 22.36    | 9.45            | 7.91              | 9.06            | 15.09           | 17.26             |
| Fenson                | 1.91          | 2.79     | 4.05              | 18.15    | n.d.            | 1.08              | n.d.            | n.d.            | n.d.              |
| Fenthion              | n.d.          | n.d.     | 11.60             | 2.03     | 1.87            | n.d.              | n.d.            | n.d.            | n.d.              |
| Fludioxonil           | n.d.          | n.d.     | n.d.              | n.d.     | n.d.            | n.d.              | n.d.            | n.d.            | n.d.              |
| Gesatamine            | n.d.          | n.d.     | 23.44             | 59.84    | 112.37          | 17.54             | 6.59            | 13.26           | 11.40             |

|                |       |       |        |        |        |       |        |        |        |
|----------------|-------|-------|--------|--------|--------|-------|--------|--------|--------|
| Isoproc carb   | 1.94  | n.d.  | n.d.   | n.d.   | n.d.   | n.d.  | n.d.   | n.d.   | n.d.   |
| Isoprothiolane | 25.96 | 40.67 | 29.45  | 69.60  | 236.21 | 23.10 | 116.75 | 142.59 | 150.17 |
| Malathion      | 2.66  | 1.58  | 59.13  | n.d.   | 12.81  | 6.67  | 1.29   | n.d.   | n.d.   |
| Mefenacet      | 4.24  | n.d.  | 370.82 | 64.32  | 54.62  | 3.47  | 3.26   | 0.83   | 0.40   |
| Metalaxyl      | 11.37 | 13.79 | 34.58  | 31.67  | 39.54  | 17.91 | 3.90   | 11.01  | 15.15  |
| Metazachlor    | n.d.  | n.d.  | 2.55   | 42.69  | 15.75  | n.d.  | n.d.   | n.d.   | n.d.   |
| Metolachlor    | 8.18  | 50.84 | 15.69  | 132.54 | 46.93  | 34.02 | 52.20  | 44.17  | 43.68  |
| Metribuzin     | n.d.  | 3.01  | 86.68  | 44.01  | 15.87  | 2.41  | 1.84   | n.d.   | n.d.   |
| Mevinphos      | n.d.  | n.d.  | 70.77  | 62.21  | 36.73  | 47.04 | 25.57  | 30.72  | 27.57  |
| Oxadiazon      | 42.78 | 2.12  | 98.51  | 28.71  | 24.11  | 2.62  | 5.55   | 1.19   | 1.74   |
| Paclobutrazol  | 54.00 | 15.21 | 730.66 | 136.39 | 144.84 | 23.70 | 8.35   | 5.47   | 11.05  |
| Phorate        | n.d.  | n.d.  | n.d.   | n.d.   | n.d.   | n.d.  | n.d.   | n.d.   | n.d.   |
| Picoxystrobin  | n.d.  | n.d.  | n.d.   | n.d.   | n.d.   | n.d.  | n.d.   | n.d.   | n.d.   |
| Pirimicarb     | n.d.  | n.d.  | 42.88  | 4.70   | 7.02   | 3.47  | 11.90  | 0.81   | 29.14  |
| Prebane        | n.d.  | n.d.  | 38.90  | 68.89  | 84.88  | 28.58 | 9.38   | 22.29  | n.d.   |
| Pretilachlor   | 2.59  | 1.41  | 17.53  | 18.22  | 10.09  | 2.26  | 10.40  | 0.69   | 0.28   |
| Procymidone    | n.d.  | n.d.  | n.d.   | n.d.   | n.d.   | n.d.  | n.d.   | n.d.   | n.d.   |
| Prometon       | n.d.  | 1.98  | n.d.   | 19.79  | n.d.   | n.d.  | 3.21   | n.d.   | 5.76   |
| Prometryn      | 15.69 | 89.44 | 70.37  | 80.00  | 78.66  | 25.49 | 21.85  | 28.20  | 36.80  |
| Propazine      | n.d.  | n.d.  | 5.23   | 6.26   | n.d.   | 3.23  | 0.41   | n.d.   | n.d.   |
| Propiconazole  | 2.88  | 2.71  | 9.40   | 25.83  | 109.28 | 1.03  | 2.93   | 1.98   | 2.24   |
| Propoxur       | 1.40  | n.d.  | n.d.   | n.d.   | n.d.   | n.d.  | n.d.   | n.d.   | n.d.   |
| Ronnel         | n.d.  | n.d.  | n.d.   | n.d.   | n.d.   | n.d.  | n.d.   | n.d.   | n.d.   |
| Sebuthylazin   | n.d.  | n.d.  | n.d.   | n.d.   | n.d.   | n.d.  | n.d.   | n.d.   | n.d.   |
| Simazine       | 2.32  | 28.01 | 2.29   | n.d.   | n.d.   | n.d.  | n.d.   | n.d.   | n.d.   |
| Simetryn       | 20.10 | 19.43 | 490.47 | 164.96 | 292.00 | 51.53 | 22.06  | 41.81  | 65.71  |
| s-Metolachlor  | n.d.  | n.d.  | 37.67  | 20.85  | 1.47   | 15.73 | 4.02   | n.d.   | n.d.   |
| Sulfotep       | n.d.  | n.d.  | 0.64   | 0.44   | n.d.   | n.d.  | n.d.   | n.d.   | n.d.   |
| Tebuconazole   | 16.87 | 9.39  | 85.35  | 49.19  | 77.00  | 41.95 | 30.98  | 17.63  | 21.01  |

|               |       |       |        |       |       |       |       |       |       |
|---------------|-------|-------|--------|-------|-------|-------|-------|-------|-------|
| Tebuthiuron   | n.d.  | n.d.  | 5.76   | 9.70  | n.d.  | n.d.  | 5.22  | 3.14  | 2.57  |
| Tokuthion     | n.d.  | n.d.  | n.d.   | 6.48  | n.d.  | 4.33  | n.d.  | n.d.  | n.d.  |
| Trichloronate | 13.03 | n.d.  | n.d.   | n.d.  | 11.59 | n.d.  | n.d.  | n.d.  | n.d.  |
| Tricyclazole  | 9.67  | 40.78 | 68.82  | 53.51 | 46.68 | 65.17 | 33.68 | 41.68 | 57.12 |
| Uniconazole   | 4.55  | 9.05  | 174.17 | 1.17  | n.d.  | 0.84  | 3.63  | 1.50  | 0.84  |

---

Note: n.d. means the result is lower than the detection limit.

Table S5 The mean concentrations of the 60 contaminants detected in dry and paddy field soil  
(ng·g<sup>-1</sup>)

| Name                  | Sowing period |             | Vegetative period |             |
|-----------------------|---------------|-------------|-------------------|-------------|
|                       | Dry field     | Paddy field | Dry field         | Paddy field |
| Acetochlor            | 80.49         | 10.83       | 36.50             | 12.30       |
| Alachlor              | 1.61          | 1.22        | 0.28              | 0.66        |
| Ametryn               | n.d.          | 3.11        | n.d.              | 0.30        |
| Anvil                 | n.d.          | 0.20        | n.d.              | 6.79        |
| Atrazine              | 67.48         | 0.09        | 9.53              | 0.19        |
| Atrazine-desisopropyl | 2.83          | 1.92        | 1.18              | 0.54        |
| Baycarb               | 0.43          | 2.51        | 0.40              | n.d.        |
| Bentazon methyl       | 0.64          | 5.81        | n.d.              | 4.28        |
| Bolstar               | n.d.          | 0.26        | 0.39              | n.d.        |
| Buprofezin            | n.d.          | n.d.        | n.d.              | 4.03        |
| Butachlor             | 1.59          | 8.46        | 0.15              | 10.96       |
| Chlorpyrifos          | 101.21        | 16.54       | n.d.              | 24.69       |
| Cycluron              | 32.93         | 21.51       | 5.89              | 4.76        |
| Demeton               | n.d.          | 2.98        | 0.42              | 0.98        |
| Desethylatrazine      | 6.08          | n.d.        | 0.59              | n.d.        |
| Diazinon              | n.d.          | n.d.        | n.d.              | n.d.        |
| Dichlorvos            | n.d.          | n.d.        | n.d.              | n.d.        |
| Dimethachlor          | 1.93          | 1.21        | 1.87              | 0.09        |
| Dimethazone           | 355.52        | 4.01        | 13.64             | 6.68        |
| Epoxiconazole         | n.d.          | n.d.        | n.d.              | n.d.        |
| Ethoprop              | n.d.          | 4.57        | 0.74              | 1.55        |
| Fenoxanil             | n.d.          | n.d.        | n.d.              | 0.95        |
| Fenson                | 1.28          | 2.66        | 0.43              | 1.84        |
| Fenthion              | 12.04         | 2.00        | n.d.              | 2.99        |
| Fludioxonil           | n.d.          | n.d.        | n.d.              | n.d.        |
| Gesatamine            | n.d.          | 0.19        | n.d.              | n.d.        |
| Isoprocab             | n.d.          | 0.14        | n.d.              | n.d.        |
| Isoprothiolane        | 2.18          | 3.77        | n.d.              | 3.90        |
| Malathion             | 3.51          | 2.87        | 1.62              | 5.62        |
| Mefenacet             | 44.37         | 119.84      | n.d.              | 23.62       |
| Metalaxyl             | 0.77          | 1.40        | 0.82              | 1.04        |
| Metazachlor           | n.d.          | n.d.        | n.d.              | n.d.        |
| Metolachlor           | 0.48          | n.d.        | 4.20              | n.d.        |
| Metribuzin            | n.d.          | n.d.        | n.d.              | n.d.        |
| Mevinphos             | 6.85          | 24.07       | 10.31             | 12.97       |
| Oxadiazon             | 10.88         | 15.81       | n.d.              | 12.34       |
| Paclobutrazol         | 0.73          | 6.04        | 0.17              | 1.57        |
| Phorate               | n.d.          | n.d.        | n.d.              | n.d.        |
| Picoxystrobin         | n.d.          | n.d.        | n.d.              | n.d.        |
| Pirimicarb            | 2.41          | 6.04        | 0.51              | 5.33        |
| Prebane               | 0.90          | 0.63        | n.d.              | n.d.        |
| Pretilachlor          | n.d.          | 7.27        | n.d.              | 5.05        |
| Procymidone           | n.d.          | 1.46        | n.d.              | 0.55        |
| Prometon              | 0.76          | 1.63        | 3.97              | 7.31        |
| Prometryn             | 4.38          | 1.17        | 0.38              | 6.01        |

|               |      |       |      |       |
|---------------|------|-------|------|-------|
| Propazine     | n.d. | n.d.  | n.d. | n.d.  |
| Propiconazole | 0.56 | 4.80  | 0.60 | 2.35  |
| Propoxur      | n.d. | n.d.  | n.d. | n.d.  |
| Ronnel        | n.d. | n.d.  | n.d. | n.d.  |
| Sebuthylazin  | n.d. | n.d.  | n.d. | n.d.  |
| Simazine      | 7.91 | n.d.  | 0.04 | 0.27  |
| Simetryn      | 2.47 | 14.77 | n.d. | 2.22  |
| s-Metolachlor | 2.21 | 0.90  | 7.66 | 0.19  |
| Sulfotep      | n.d. | n.d.  | n.d. | n.d.  |
| Tebuconazole  | n.d. | 5.00  | 0.60 | 16.76 |
| Tebuthiuron   | 0.70 | 0.79  | n.d. | n.d.  |
| Tokuthion     | 0.84 | n.d.  | 1.30 | n.d.  |
| Trichloronate | n.d. | n.d.  | n.d. | n.d.  |
| Tricyclazole  | 1.66 | 5.32  | 4.06 | 6.36  |
| Uniconazole   | n.d. | n.d.  | n.d. | n.d.  |

---

Note: n.d. means the result is lower than the detection limit.

Table S6 Octanol-water partition coefficient of 57 pesticides and 3 degradations

| Name                  | Octanol-water partition coefficient (Kow) at pH 7, 20 °C |
|-----------------------|----------------------------------------------------------|
|                       | LogKow                                                   |
| Acetochlor            | 4.14                                                     |
| Alachlor              | 3.09                                                     |
| Ametryn               | 2.63                                                     |
| Anvil                 | 3.9                                                      |
| Atrazine              | 2.7                                                      |
| Atrazine-desisopropyl | 1.15                                                     |
| Baycarb               | 2.78                                                     |
| Bentazon methyl       | -                                                        |
| Bolstar               | 5.48                                                     |
| Buprofezin            | 4.5                                                      |
| Butachlor             | 4.5                                                      |
| Chlorpyrifos          | 4.7                                                      |
| Cycluron              | 2.84                                                     |
| Demeton               | 3.21                                                     |
| Desethylatrazine      | 1.51                                                     |
| Diazinon              | 3.69                                                     |
| Dichlorvos            | 1.9                                                      |
| dimethachlor          | 2.17                                                     |
| Dimethazone           | 2.58                                                     |
| Epoxiconazole         | 3.3                                                      |
| Ethoprop              | 2.99                                                     |
| Fenoxanil             | 3.35                                                     |
| Fenson                | 3.57                                                     |
| Fenthion              | 4.84                                                     |
| Fludioxonil           | 4.12                                                     |
| Gesatamine            | 2.69                                                     |
| Isoprocab             | 2.32                                                     |
| Isoprothiolane        | 3.3                                                      |
| Malathion             | 2.75                                                     |
| Mefenacet             | 3.23                                                     |
| Metalaxyl             | 1.75                                                     |
| Metazachlor           | 2.49                                                     |
| Metolachlor           | 3.4                                                      |
| Metribuzin            | 1.7                                                      |
| Mevinphos             | 0.127                                                    |
| Oxadiazon             | 5.33                                                     |
| Paclobutrazol         | 3.11                                                     |
| Phorate               | 3.86                                                     |
| Picoxystrobin         | 3.6                                                      |
| Pirimicarb            | 1.7                                                      |
| Prebane               | 3.66                                                     |
| Pretilachlor          | 4.08                                                     |
| Procymidone           | 3.3                                                      |
| prometon              | 2.91                                                     |
| Prometryn             | 3.34                                                     |
| Propazine             | 3.95                                                     |



|               |      |
|---------------|------|
| Propiconazole | 3.72 |
| Propoxur      | 0.14 |
| Ronnel        | 4.88 |
| Sebuthylazin  | -    |
| Simazine      | 2.3  |
| Simetryn      | 2.8  |
| s-Metolachlor | 3.05 |
| Sulfotep      | 3.99 |
| Tebuconazole  | 3.7  |
| Tebuthiuron   | 1.79 |
| Tokuthion     | -    |
| Trichloronate | 5.23 |
| Tricyclazole  | 1.4  |
| Uniconazole   | 3.84 |

---

Note: Data from PPDB, Pesticides Properties Data Base, and University of Hertfordshire; “-” means the data were not provided.
